# Supplementary material for: The contribution of transport emissions to ozone mixing ratios and methane lifetime in 2015 and 2050 in the Shared Socioeconomic Pathways (SSPs)
Source: Copernicus journal article supplement (doi:10.5194/acp-24-12079-2024), 2024-10-30
Supplement: Supplementary file 2 [file acp-24-12079-2024-supplement.zip]

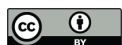

*Supplement of*

**The contribution of transport emissions to ozone mixing ratios and methane lifetime in 2015 and 2050 in the Shared Socioeconomic Pathways (SSPs)**

**Mariano Mertens et al.**

*Correspondence to:* Mariano Mertens ([mariano.mertens@dlr.de](mailto:mariano.mertens@dlr.de))

- [acp-24-12079-2024-supplement-title-page.pdf](#)
- [meccanism.pdf](#)
- [supplement.pdf](#)

The copyright of individual parts of the supplement might differ from the article licence.
